# Supplementary material for: Type 2 cannabinoid receptor expression on microglial cells regulates neuroinflammation during graft-versus-host disease
Source: PubMed Central journal article supplement (PMC11142740; doi:10.1172/jci175205), 2024-04-25

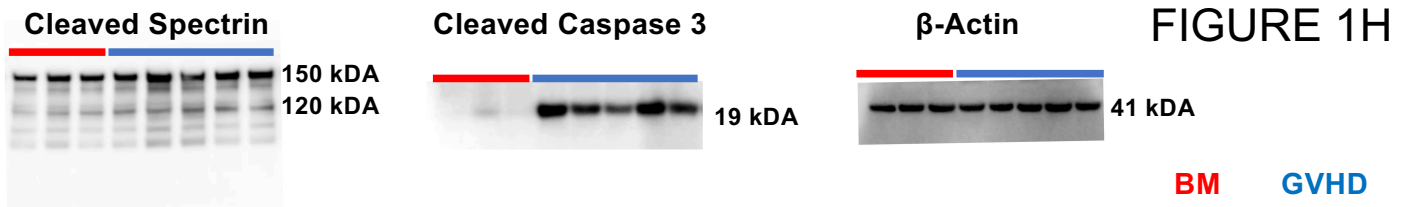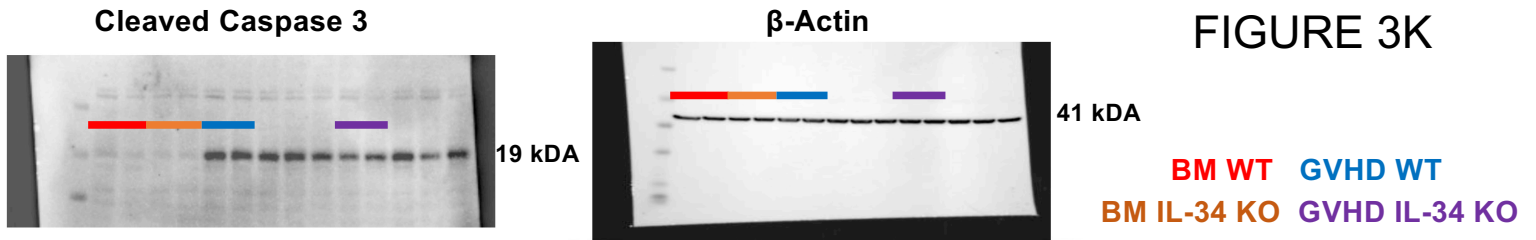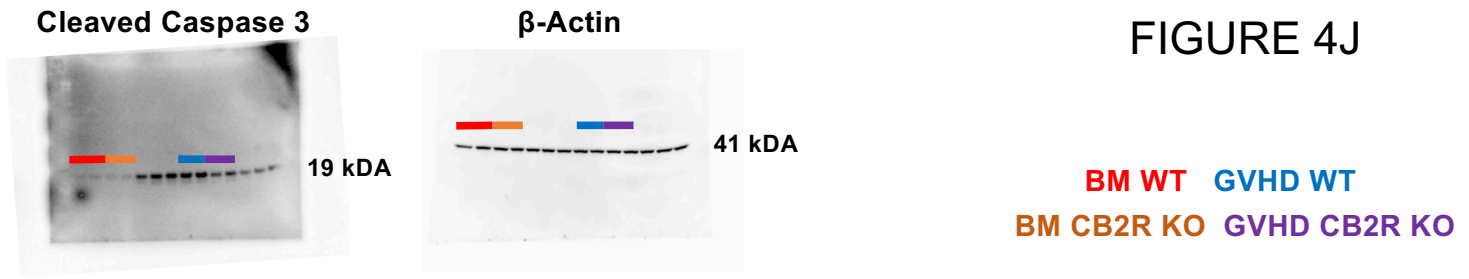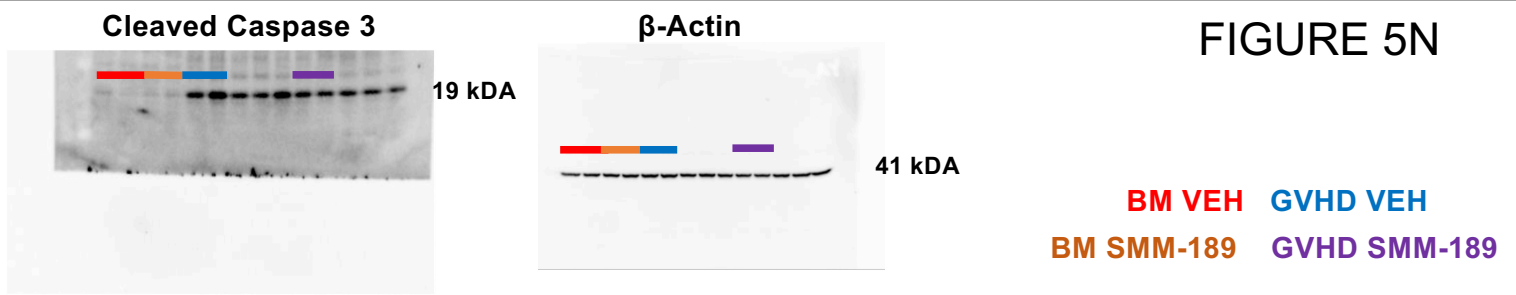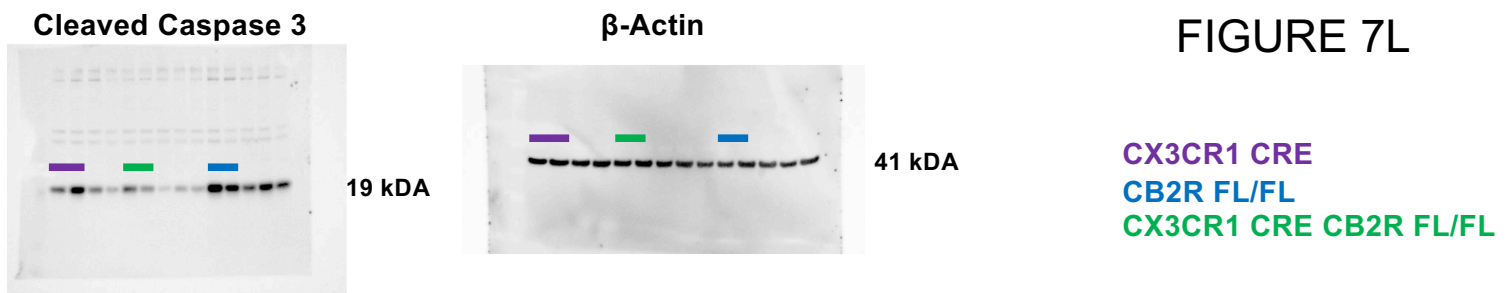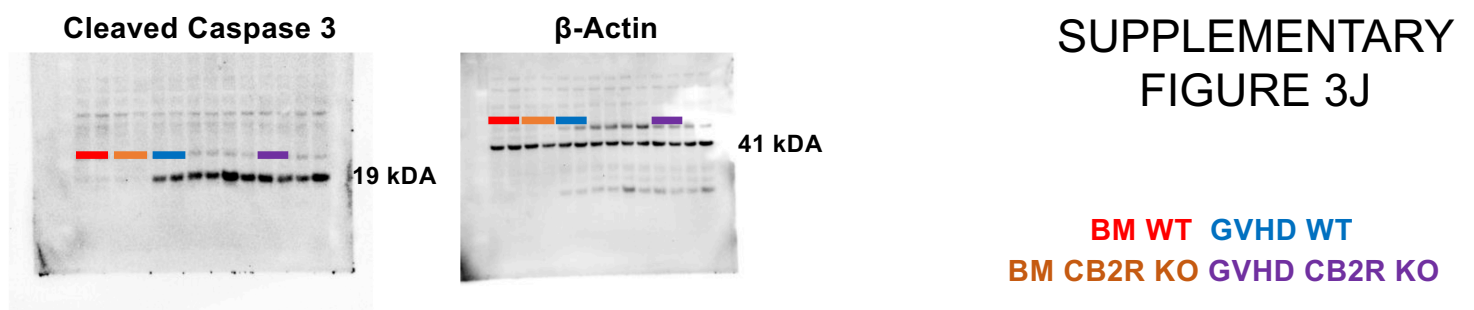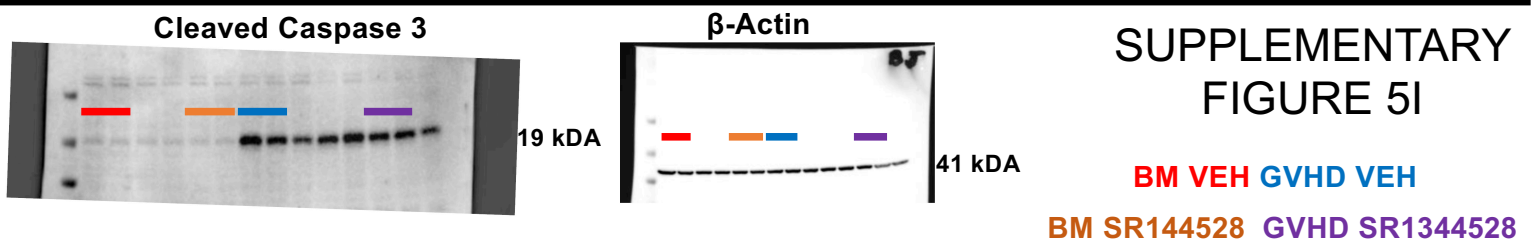

Supplement: jci-134-175205-s202.pdf [file jci-134-175205-s202.pdf]
